# Novel Covariance-Based Neutrality Test of Time-Series Data Reveals Asymmetries in Ecological and Economic Systems

Alex Washburne<sup>1,4,5</sup>, Josh Burby<sup>2</sup> and Daniel Lacker<sup>3</sup>

February 11, 2016

Author Affiliations:

<sup>1</sup>Princeton University, program for Quantitative and Computational Biology

<sup>2</sup>Princeton University, Physics Department, Plasma Physics Lab

<sup>3</sup>Princeton University, Department of Operations Research and Financial  
Engineering

<sup>4</sup>Duke University, Department of Biology

<sup>5</sup>Corresponding Author, [alex.d.washburne@gmail.com](mailto:alex.d.washburne@gmail.com)

## 1 Abstract

2 Systems as diverse as the interacting species in a community, alleles at a  
3 genetic locus, and companies in a market are characterized by competi-  
4 tion (over resources, space, capital, etc) and adaptation. Neutral theory,  
5 built around the hypothesis that individual performance is independent  
6 of group membership, has found utility across the disciplines of ecology,  
7 population genetics, and economics, both because of the success of the  
8 neutral hypothesis in predicting system properties and because deviations  
9 from these predictions provide information about the underlying dynam-  
10 ics. However, most tests of neutrality are weak, based on static system  
11 properties such as species-abundance distributions or the number of sin-  
12 gletons in a sample. Time-series data provide a window onto a system's  
13 dynamics, and should furnish tests of the neutral hypothesis that are more  
14 powerful to detect deviations from neutrality and more informative about  
15 to the type of competitive asymmetry that drives the deviation.

16 Here, we present a neutrality test for time-series data. We apply this  
17 test to several microbial time-series and financial time-series and find that  
18 most of these systems are not neutral. Our test isolates the covariance  
19 structure of neutral competition, thus facilitating further exploration of  
20 the nature of asymmetry in the covariance structure of competitive sys-  
21 tems. Much like neutrality tests from population genetics that use relative  
22 abundance distributions have enabled researchers to scan entire genomes  
23 for genes under selection, we anticipate our time-series test will be useful  
24 for quick significance tests of neutrality across a range of ecological, eco-  
25 nomic, and sociological systems for which time-series data are available.  
26 Future work can use our test to categorize and compare the dynamic fin-  
27 gerprints of particular competitive asymmetries (frequency dependence,  
28 volatility smiles, etc) to improve forecasting and management of complex  
29 adaptive systems.

## 30 Author Summary

31 From fisheries and forestries to game parks and gut microbes, managing a com-  
32 munity of organisms is much like managing a portfolio. Managers care about  
33 diversity, and calculations of risk - for extinction or financial ruin - require  
34 accurate models of the covariance between the parts of the portfolio.

35 To model the covariances in portfolios or communities, it helps to start sim-  
36 ple with a null model assuming the equivalence of species or companies relative  
37 to one another (termed "neutrality") and letting the data suggest otherwise.  
38 Researchers in biology and finance have independently entertained and tested  
39 neutral models, but the existing tests have used snapshots of communities or the  
40 variance of fluctuations of individual populations, whereas tests of the covari-  
41 ances between species can better inform the development of alternative models.

42 We develop a covariance-based neutrality test for time-series data and use  
43 it to show that the human microbiome, North American birds, and companies  
44 in the S&P 500 all have a similar deviation from neutrality. Understanding  
45 and incorporating this non-neutral covariance structure can yield more accurate  
46 alternative models of community dynamics which can improve our management  
47 of "portfolios" of multi-species systems.

## 48 Introduction

49 "*(A)s more individuals are produced than can possibly survive, there must in*  
50 *every case be a struggle for existence, either one individual with another of the*  
51 *same species, or with the individuals of distinct species, or with the physical*  
52 *conditions of life.*" - Charles Darwin, Origin of Species [1]

53 Adaptive evolution requires that rivalrous goods are consumed by agents,  
54 those agents have heritable variation in how they acquire and consume the

55 rivalrous goods, and the fitness of agents increases with the amount of goods  
56 consumed [2]. By Lewontin's listing of the necessary conditions of evolution, a  
57 variety of systems can be seen as evolving. Genes in populations, species in a  
58 community, companies in a market, and political groups in a society all satisfy  
59 Lewontin's axioms [2].

60 Canopy space is a rivalrous resource in the multi-species closed-canopy forests.  
61 If nothing else intervenes, a competitively superior tree species will dominate  
62 the canopy just like a competitively superior gene will become fixed in a pop-  
63 ulation. In economic systems, companies compete over capital, customers, and  
64 labor, and a company well-adapted to a market will increase its share of the  
65 resources. In social systems, political groups compete over votes and occupied  
66 positions of power, and political groups with superior recruitment compared to  
67 other groups - either by persuasion, coercion, aggression, or reproduction with  
68 vertical transmission of culture - will increase the votes it receives and/or its  
69 representation in various positions of power.

70 These generalized competitive systems are examples of "complex adaptive  
71 systems" [3, 4, 5] and understanding how they evolve can provide insight into the  
72 drivers of adaptive evolution [6], diversity maintenance in human and natural  
73 systems [7], portfolio construction in a market [8], and problems of recognition  
74 and representation in multicultural societies [9]. Much literature has explored  
75 the stochastic fluctuations of individual populations (e.g. [10, 11]) or asset prices  
76 [12] in these systems, and accurate models of the stochastic time-evolution of  
77 multi-species systems can enable calculations of the risk of extinction [13], the  
78 dynamics of diversity (such as the entropy or evenness of a system), portfolio  
79 analysis, and other features of interest.

80 A common stochastic model in which all groups are functionally equivalent,  
81 termed "Neutral Theory" in ecology and population genetics, has been used

82 across many systems [14, 15, 16, 17, 18]. By “functionally equivalent”, we mean  
83 that every agent’s performance in acquiring the rivalrous resource is indepen-  
84 dent of their group membership. In other words, an organism’s species identity,  
85 a company’s strategy or sector, a citizen’s political identity, or a political party’s  
86 platform have no impact on their ability to hold or acquire new rivalrous re-  
87 sources. Neutrality is a parsimonious starting point for community modeling  
88 because it is based on first principles of random birth and death or acquisition  
89 and release of resources that are appropriate for many competitive systems, and,  
90 because neutrality does not assume particular traits that distinguish groups and  
91 complex interactions between groups, it is invariant to grouping: the popula-  
92 tions of neutral species can be aggregated into larger groups whose competition  
93 is also neutral.

94 Neutrality is often posed as a null model for multi-species systems because  
95 it can be parsimonious to assume, initially, that all species are equivalent. The  
96 mathematical tractability of neutral systems has allowed for useful calculations  
97 [19] that can sometimes accurately describe features of the system. However,  
98 despite the mathematical ease, calculations for features such as extinction time  
99 or the dynamics of portfolio diversity based on neutrality may be inaccurate  
100 for systems with non-neutral dynamics such as positive or negative frequency-  
101 dependent selection. Thus, there is a need for powerful and informative tests of  
102 neutrality to assess whether or not the dynamics of the competitive system are  
103 neutral.

104 In population genetics, tests of neutrality [20, 21] have facilitated rapid con-  
105 ceptual and empirical advancements [22], allowing researchers to scan entire  
106 genomes for neutral loci and identify loci that have been under selection. Neu-  
107 trality tests developed in ecological and sociological systems test features of  
108 rank-abundance and frequency-abundance distributions [16, 23, 24]. Many of

109 these existing neutrality tests utilize snapshots of a competitive system, but  
110 time-series contain a tremendous amount of data and can enable stronger tests  
111 of neutrality.

112 Some work has been done developing and utilizing tools to test whether  
113 or not population dynamics are consistent with Neutral Theory [10, 25, 11].  
114 These tests rely on a particular description of Neutral Theory as the one-step  
115 process [26] posed by Kimura and Hubbell, but the proof [27] that the non-  
116 zero-sum volatility-stabilized market models [17] converge to neutral drift in  
117 relative abundances motivates a broader definition and more general tests of  
118 neutrality. Since neutrality is the per capita equivalence between species, it is  
119 necessarily relative, not absolute; a population is not neutral per se, but can  
120 only be neutral relative to another population. To the best of our knowledge, the  
121 existing time-series tests have all analyzed whether or not the variance in jumps  
122 in abundance increase linearly or quadratically with the population size prior  
123 to the jump, and none have examined the covariance structure of fluctuations  
124 in relative abundance.

125 Here, we present, to our knowledge, the first covariance-based neutrality  
126 test for time-series data. Our test provides deeper insight into the nature of  
127 non-neutrality than traditional tests of rank-abundance distributions and the  
128 volatility of individual populations. Our test utilizes the grouping invariance of  
129 neutral systems to isolate and test the covariance between changes in species'  
130 relative abundances over small time intervals, allowing a rejection of neutral-  
131 ity for the entire community considered. We apply our test to 6 metagenomic  
132 time-series [28], a time-series of breeding birds across North America [29], and  
133 a time-series of market capitalization of companies in the S&P 500 from 2000-  
134 2005. We show that even some systems whose rank-abundance distributions ap-  
135 pear neutral can exhibit significantly non-neutral covariances between species

Figure 1: Illustration of our method **(A)** The dynamics of a 15-species neutral community of 10,000 individuals and migration probability  $m = 0.0002$  (shown here) can be approximated by a WFP with  $\lambda = 20$ . If the community is neutral, then the CVTs should yield homoskedastic plots of  $\nu_t$  versus  $f_t$ . We test neutrality by randomly drawing from the  $2^n$  possible CVTs, performing homoskedasticity tests on  $\nu_t$  versus  $f_t$ , and then testing the uniformity of the resulting P-value distribution using a modified KS-test (see details in supplement section S3). **(B)** The relative abundances of 15 independent, mean-reverting geometric Brownian motions,  $d \log X_t = \mu(b - \log X_t)dt + \sigma dW_t$  with  $\mu = 15$ ,  $\sigma = 30$ ,  $b = 10$ . Neutrality is rejected by the highly non-uniform distribution of P-values. The left-skewed P-value distribution indicates many CVTs had volatilities that depended on the state variable,  $f_t$ .

136 as detected by our test. Furthermore, our test, based on random groupings  
137 of species, illustrates how to analyze the volatility of randomly formed groups  
138 to reveal state-dependent volatility that differs from neutrality. The non-neutral  
139 state-dependent covariance structure uncovered here can be incorporated to im-  
140 prove our models of community dynamics and calculations of species' extinction  
141 times, portfolio risk, and more.

## 142 Results

143 Our method is proven analytically in the Materials & Methods section, and a  
144 demonstration of the method is provided in Figure 1.

145 We apply our neutrality test to 8 different datasets. Six of these datasets  
146 are sequence-count data of microbial communities [28] from three body sites on  
147 two individuals. One dataset is survey of breeding birds across North America  
148 from 1966-2014 [29], and one dataset is financial data, obtained from the Cen-  
149 ter for Research in Security Prices, of the day-end market shares and market  
150 capitalization of 451 companies in the S&P 500 from January 1, 2000 to Jan-  
151 uary 1, 2005. These datasets are long, time-series datasets, many of which have  
152 rank-abundance distributions that are decently fit by neutral theory's expected  
153 rank-abundance distribution (see supplement part S1 for a detailed description

Figure 2: Applying our test to time-series datasets reveal non-neutral competitive dynamics in microbial and financial systems. Goodness of fit P-values displayed are from a modified KS-test which accounts for dependence among the observations. Despite decent fits of neutral species-abundance distributions, our time-series test reveals that competitive asymmetries are important drivers in all systems except the female tongue bacteria.

154 of the datasets and fits of neutral theory’s rank-abundance distributions).

155 Our test relies on multiple groups of species. To group the species, we  
156 randomly selected  $a_i = \pm 1$ , for 4,000 independent groups, we then calculated  
157  $\nu_t$  as in equation (6), and used a White test [30] to test the homoskedasticity  
158 of  $\nu_t$ . The White test performed auxiliary regression with a generalized linear  
159 model with a log-normal link function of the form

$$\hat{\epsilon}^2 = \beta_0 + \beta_1 f_t + \beta_2 f_t^2 + \gamma \quad (1)$$

160 where  $\hat{\epsilon}^2$  are the squared residuals from similar quadratic regression of  $f_t$  on  
161  $\nu_t$ . With a 0.005 significance threshold, neutrality was rejected in all but one  
162 dataset (figure 2).

163 Rejecting neutrality for these competitive systems motivates further investi-  
164 gation on whether the rejection of neutrality stems from sampling error or from  
165 true competitive asymmetries in the system. For the financial datasets, there  
166 is no sampling error - the reported values of day-end prices are the true values.  
167 For the metagenomic datasets, sampling error for sequence count data could be  
168 driving apparent non-neutrality.

169 Figure 3 examines the competitive asymmetry in the male tongue’s bacterial  
170 community. Scatter plots of  $\nu_t$  vs.  $f_t$  reveal a downward trend indicative of mean  
171 reversion - jumps in  $f_t$  are positive when  $f_t$  is above its mean and negative when  
172  $f_t$  is above its mean (figure 3A). The mean reversion is regressed out prior to  
173 our auxiliary regression, but such strong mean reversion is not apparent in the  
174 simulated neutral community of figure 1. The discrepancy between the mean



Figure 3: (A-D) Analyzing the non-neutrality of competitive systems (A) The negative relationship between  $\nu_t$  vs.  $f_t$  indicates mean reversion. Overlaying  $\nu_t$  vs.  $f_t$  scatter plot from a particular CVT from the male tongue data onto the results from 4,000 WFP trajectories with long sampling intervals,  $\Delta t$ , shows that mean reversion can be accounted for by sparse time-sampling of the data. (B) However, even when correcting for sparse time-sampling, the left-skewed P-value distribution in the male tongue indicates stronger signal of non-neutral volatility than 16,000 surrogate WFPs. (C) The parameter  $\beta_2$  from significantly ( $P < 0.001$  for male tongue,  $P < 0.01$  for surrogate data) heteroskedastic auxiliary regressions in equation 7 reveals significantly more  $\beta_2 > 0$  than  $\beta_2 < 0$  in the data. The different P-value cutoffs are for visualization - the same bias for  $\beta_2 > 0$  holds for a standard cutoff of  $P < 0.01$  (D) Overlaying scatterplots of the residuals,  $\hat{\epsilon}^2$ , from all heteroskedastic cases ( $P < 0.01$ ) of the male tongue data, reveals the empirical pattern of heteroskedasticity. Compared to surrogate neutral data, the male tongue is more volatile when the groupings are uneven, suggesting that either rare or abundant groups are more volatile - or equal groupings are relatively less volatile - than neutrality would predict. (E) All datasets have the same over-abundance of  $\beta_2 > 0$  for heteroskedastic ( $P < 0.05$ ) CVTs.

175 reversion in the data and the simulated neutral community may be due to a  
176 stronger and/or non-linear mean reversion in the microbial system, or it may  
177 be due to the relatively long time between time points in the data relative to  
178 the turnover rate of the community. Such sparse time-sampling could affect the  
179 accuracy of our test, which relies on the assumption that  $\Delta t$  in equation 3 is  
180 small. A neutral community may still have mean reversion due to migration  
181 from a metacommunity or mutation/conversion rates between classes of agents,  
182 and sparsely sampling a time-series of such a neutral community may yield the  
183 same downward trend on plots of  $\nu_t$  versus  $f_t$ .

184 To examine if the long time between time points accounts for the perceived  
185 non-neutrality from our analysis of figure 2, we produced surrogate data by  
186 simulating neutral communities with similarly sparse time points. Parameter  
187 estimation of  $\lambda$ ,  $\rho$  and WFP simulation is described in the supplement section S4.  
188 For one particular CVT, we simulated 4,000 independent trajectories to allow  
189 the superposition of the  $\nu_t$  vs  $f_t$  scatter plots from the male tongue data over  
190 the points from the surrogate data. Much of the strong mean reversion in the  
191 data can in fact be accounted for by the sparsity of time points (figure 4A), but

192 the P-value distribution from constant-volatility tests of 16,000 randomly drawn  
193 surrogate CVT simulations is much more uniform than the same distribution  
194 from the male tongue, which has many small P-values indicative of consistent  
195 state-dependent volatility of  $f_t$  (figure 3b). Thus, the non-neutrality of the male  
196 tongue dataset is not due to long sampling intervals.

197 The male tongue microbiome deviates from neutrality by having a signifi-  
198 cantly more  $\beta_2 > 0$  than  $\beta_2 < 0$  for those auxiliary regressions yielding signifi-  
199 cant heteroskedasticity (figure 3C).  $\beta_2 > 0$  indicates that the volatility increases  
200 farther away from the mean and plotting the residuals,  $\hat{\epsilon}^2$  against the state vari-  
201 able,  $f_t$ , reveals the form of heteroskedasticity (figure 3D). A similar significant  
202 hyper-abundance of  $\beta_2 > 0$  exists for all datasets considered here (figure 3E).

## 203 Discussion

204 Evolution, driven by competition over rivalrous goods or limiting resources,  
205 is a phenomenon common to ecology, economics and sociology, and accurate  
206 statistical models of how competitive systems evolve can allow us to forecast,  
207 manage, and invest in them [2, 3, 8, 1, 31]. Neutral Theory is a null model of  
208 competition which assumes that all players are equal - that a canopy tree fills a  
209 gap in the canopy independent of its species' identity, a dollar finds its way to  
210 another dollar independent of who owns the dollar, and a seat in congress is filled  
211 by someone independent of the racial, cultural or political traits of the successor  
212 or predecessor. It's been hypothesized that neutrality could arise naturally as  
213 a result of competitively inferior species going extinct [32], and thus systems  
214 would tend towards neutrality over long periods of time, but the accuracy and  
215 generality of Neutral Theory as a dynamical model for a range of competitive  
216 systems was unclear.

217 We have provided a time-series test of neutral covariance structure that

218 reveals a common feature of non-neutrality across a range of ecological and  
219 economic systems. Our test is based on the grouping invariance of neutral  
220 communities, and this grouping invariance is maintained by a particular co-  
221 variance structure of volatilities, namely where the volatility of a group,  $X_t^i$ ,  
222 is  $v(X_t^i) = cX_t^i(1 - X_t^i)$  for some constant,  $c$ , which can only be invariant to  
223 grouping if the covariance between groups  $i$ , and  $j$  is  $\Sigma_{i,j} = -cX_t^iX_t^j$ . We test  
224 neutrality by randomly grouping species and testing if the volatility of those  
225 random groups is of the form of  $v(x)$ . A deviation from  $v$  can indicate non-  
226 neutral covariance structure. If, for instance, instead of a quadratic curve of  
227  $v$ , the volatility of random groups in the data follows a bell-shaped curve with  
228 positive curvature at the end-points, it could indicate that there is a positive  
229 covariance between rare species, possibly due to kill-the-winner effects or due  
230 to the relative abundances being driven by fluctuations in the largest popula-  
231 tions. Conversely, excessive negative curvature could indicate strong negative  
232 covariances between rare species, possibly due to relatively constant populations  
233 of abundant species. Future work analyzing the volatility surfaces of random  
234 groups can improve our test and allow researchers to quickly isolate particular  
235 forms and fingerprints of common, non-neutral competitive asymmetries.

236 The results presented here are limited to the particular choice of species (the  
237 taxonomic scale), resource (trophic scale), and time scale. However, an analysis  
238 restricted to a particular scale means that our test can also allow researchers to  
239 probe multiple taxonomic, trophic and time-scales to see if there are patterns in  
240 which scales are most/least neutral in their dynamics. An alternative grouping  
241 of these original OTUs by genera may reveal different results by conditioning the  
242 groupings of species on a particular sub-set of possible groups, namely by group-  
243 ing species with recent ancestors and shared traits together, and consequently  
244 this test could serve as a tool for evaluating competition at multiple taxonomic

245 scales. The results are also limited to the choice of resource: companies within  
246 a sector governed by trust-busting policies which break the neutral symmetry in  
247 their market capitalization dynamics may still be neutral in their competition  
248 over the ethnic or cultural composition of their labor force. It's possible that  
249 microbes in the gut are not neutral in their short-term fluctuations over the  
250 course of a year, but perhaps are neutral over longer time-scales that average  
251 out short-term fluctuations in diet and physiological state that are known to  
252 have predictable effects on microbial communities [33, 34].

253 Our test can be applied to any community of competing agents classified into  
254 discrete groups for which time-series of relative abundances (or market share,  
255 etc) of the groups are available. This test is most effective when the time-series  
256 is long and the spacing between samples is short relative to the turnover rate of  
257 the underlying resources (trees, dollars, congressional seats). There are many  
258 ways to build on our method. Explicit calculations of the drift and volatility  
259 over long time-intervals can improve our method for datasets with sparse time  
260 points. The dependence of the CVTs may be calculated as copulas allowing the  
261 implementation of a more exact goodness of fit test [35]. There may be more  
262 CVTs that solve the Hamilton-Jacobi equation, and different CVTs might be  
263 more specialized at detecting different asymmetries in competitive systems.

264 Neutrality tests of time-series data can help us understand the stochastic  
265 time-evolution of competitive systems and facilitate better prediction and man-  
266 agement. For bacteria in the gut, for instance, understanding the important  
267 non-neutral forces governing the dynamics could allow progress towards the  
268 stochastic pharmacokinetics of probiotics [36]. Understanding the predictability  
269 of invasions at different taxonomic scales can tell us whether to evaluate metage-  
270 nomic or ecological datasets based on the species, or whether other taxonomic  
271 levels will yield a more informative analysis - perhaps grouping tropical trees

272 into the family Fabaceae, the family Melastomataceae, the genus *Cecropia*, and  
273 all other trees reveals trophic structure of tropical forests and competitive asym-  
274 metries that are drowned out by analyses at the species level. Demonstrating  
275 that the non-neutrality of portfolios is consistent with rare-species advantages  
276 in the Atlas model [8] would have major implications for portfolio design. In all  
277 cases, the first step of empirically demonstrating the existence of competitive  
278 asymmetries in time-series data can now be done with the test provided here.

## 279 **Materials and Methods**

### 280 *Neutral Theory and the Wright-Fisher Process*

281 Large neutral communities are well-approximated by a Wright-Fisher Process  
282 (WFP) [37, 38]. The convergence of discrete neutral communities to the contin-  
283 uous diffusion model of the WFP is covered in [39], and some numerical methods  
284 used for parameter estimation and simulation have been produced by [31]. The  
285 WFP is a continuous-state, continuous-time approximation of Kimura’s theory  
286 [14], it is an approximation of Hubbell’s neutral theory [15] when speciation  
287 rates are negligible over the timescale of interest, and it describes the dynam-  
288 ics of relative abundances of non-zero-sum volatility-stabilized market models  
289 [17, 27]. Using the WFP as a continuous approximation of large, finite communi-  
290 ties simplifies the covariance in the jumps between species’ relative abundances,  
291 thereby permitting the analysis below.

292 The WFP models the stochastic time-evolution of relative abundances of  $n$   
293 species. Let  $\mathbf{X}_t = (X_t^1, \dots, X_t^n)$  be the vector of relative abundances, the WFP  
294 is defined by the Itô SDE

$$d\mathbf{X}_t = \lambda(\rho - \mathbf{X}_t) dt + \sigma(\mathbf{X}_t) d\mathbf{W}_t \quad (2)$$

295 where  $\lambda > 0$  and  $\rho > 0$ . The covariation between relative abundances of different  
296 species is given by the elements of  $\Sigma = \sigma\sigma^T/2$ , where

$$\Sigma_{i,j}(x_1, \dots, x_n) = \begin{cases} x_i(1-x_i) & i = j \\ x_i x_j & i \neq j \end{cases}. \quad (3)$$

297 The deterministic motion, or drift, of the WFP -  $\lambda(\rho - \mathbf{X}_t)$  - yields exponen-  
298 tial mean reversion like many dynamical systems reverting to a nearby stable  
299 equilibrium. The quadratic covariation of the WFP,  $\Sigma$ , captures the stochastic  
300 fingerprint of neutrality; it arises from randomly drawing a resource to be freed  
301 from its agent followed by randomly drawing one of the remaining agents to  
302 acquire that resource with a probability proportional to the agent's current re-  
303 source ownership. The family of Wright-Fisher Processes is closed to grouping,  
304 meaning that if a multi-species community's dynamics are governed by a WFP,  
305 species can be grouped (e.g. collecting species into genera or higher taxonomic  
306 levels) and the dynamics of the resulting, re-grouped community will also be  
307 governed by a WFP.

### 308 *Testing Neutral Covariance Structure*

309 We developed a test that is intentionally sensitive to the state-dependent noise  
310 of the WFP, allowing researchers to test the underlying stochastic model of the  
311 random turnover of resources at the heart of neutral competition. Developing  
312 a strong test of the state-dependent covariance is not trivial, though, because  
313 direct measurement of the covariance of jumps conditioned on the state of the  
314 system,  $\text{Cov}[\Delta\mathbf{X}_t|\mathbf{X}_t]$ , would require many replicate time points each with the  
315 same initial state,  $\mathbf{X}_t$ , and, even with multiple time points at the same state,  
316 the sparsity of the high-dimensional data challenges the accurate estimation  
317 and significance testing of the covariance matrix. To circumvent these problems

318 of replicate time points and high dimensionality and develop a strong test the  
319 state-dependent noise of the WFP, we find a variance-stabilizing transformation  
320 for the WFP that allows a regression-based heteroskedasticity test [40].

321 To be precise, we are looking for a real-valued function  $f(\mathbf{X}_t)$  such that for  
322  $\mathbf{X}_t$  obeying the WFP law in equation (1),

$$\lim_{\Delta t \rightarrow 0} \text{Var} \left[ \frac{f(\mathbf{X}_{t+\Delta t}) - f(\mathbf{X}_t)}{\sqrt{\Delta t}} \right] = \text{const.} \quad (4)$$

323 This approach is conceptually similar to the variance-stabilizing tools used for  
324 population fluctuation analyses [10, 25, 11] which stabilize the variance in jumps  
325 of a population size, except our function must stabilize the covariance of jumps  
326 between populations, not just the variance. In particular, to have a constant  
327 volatility, our function  $f$  must satisfy the Hamilton-Jacobi equation,

$$\nabla f^T \Sigma \nabla f = \text{const.} \quad (5)$$

328 (see supplement part S2 for more details). The grouping invariance of the WFP  
329 can be used to intuit and show that there are at least  $2^n$  different variance-  
330 stabilizing transformations of the WFP, parametrized by a vector  $\mathbf{a}$ :

$$f_{\mathbf{a}}(\mathbf{X}_t) = \arcsin(a_1 X_t^1 + \dots + a_n X_t^n), \quad (6)$$

331 where  $a_i = \pm 1$  for all  $i$ .

332 After transforming the data with  $f_{\mathbf{a}}$ , we need to perform a constant-volatility  
333 test. To test the constant volatility of  $f$ , we test the homoskedasticity of stan-  
334 dardized jumps,

$$\nu_t = (f_{t+\Delta t} - f_t) / \sqrt{\Delta t}, \quad (7)$$

335 following regression on  $f_t$  to eliminate the state-dependent drift.

336 A homoskedasticity test of  $\nu_t$  for a single CVT is a test of neutrality for  
337 time-series data. However, with  $2^n$  different CVTs, one can perform multiple  
338 hypothesis tests. For any multiple-hypothesis tests, if the null hypothesis is true,  
339 the distribution of P-values is uniform. In this paper, we test the uniformity  
340 of the distribution of resultant P-values from homoskedasticity tests of  $\nu_t$  for  
341 a number of randomly drawn CVTs. Figure 1 illustrates this test for 2,000  
342 randomly drawn CVTs and shows the successful rejection of the WFP for the  
343 relative abundances of a mean-reverting geometric Brownian motion.

344 The P-values arising from homoskedasticity tests of different CVTs are not  
345 independent. Consequently, a Kolmogorov-Smirnov test of the P-value distri-  
346 bution against a uniform distribution would have a high false-positive rate. To  
347 reduce the false-positive rate, we perform a perturbation analysis to generate  
348 conservative estimates of cutoffs for the KS statistic at 0.05 and 0.005 signifi-  
349 cance levels. Details of the sensitivity analysis are provided in the supplement  
350 part S3.

## 351 Acknowledgments

352 The authors would like to thank R. Chisholm, S. Levin, S. Pacala, J. O'dwyer,  
353 and J. B. Socolar for their discussions and feedback. In particular, A.D.W.  
354 would like to thank J. B. Socolar for numerous excellent recommendations that  
355 have greatly improved this manuscript, and both A. Gammie and D. Nemergut  
356 for their encouragement and support.

## 357 References

- 358 [1] Darwin C, Bynum WF. The origin of species by means of natural selection:  
359 or, the preservation of favored races in the struggle for life. AL Burt; 2009.



- 360 [2] Lewontin RC. The units of selection. Annual review of ecology and sys-  
361 tematics. 1970;p. 1–18.
- 362 [3] Holland JH. Complex adaptive systems. Daedalus. 1992;p. 17–30.
- 363 [4] Levin SA. Ecosystems and the biosphere as complex adaptive systems.  
364 Ecosystems. 1998;1(5):431–436.
- 365 [5] Arthur WB. Complexity and the economy. science. 1999;284(5411):107–  
366 109.
- 367 [6] Grant PR, Grant BR. Evolution of character displacement in Darwin’s  
368 finches. science. 2006;313(5784):224–226.
- 369 [7] Bengtsson J. Interspecific competition increases local extinction rate in a  
370 metapopulation system. Nature. 1989;340(6236):713–715.
- 371 [8] Fernholz ER. Stochastic portfolio theory. Springer; 2002.
- 372 [9] Taylor C, et al.. Multiculturalism: Examining the Politics of Recognition,  
373 ed. Amy Gutmann. Princeton: Princeton University Press; 1994.
- 374 [10] Lande R, Engen S, Saether BE. Stochastic population dynamics in ecology  
375 and conservation. Oxford University Press Oxford; 2003.
- 376 [11] Kalyuzhny M, Seri E, Chocron R, Flather CH, Kadmon R, Shnerb NM.  
377 Niche versus Neutrality: A Dynamical Analysis. The American Naturalist.  
378 2014;184(4):439–446.
- 379 [12] Black F, Scholes M. The pricing of options and corporate liabilities. The  
380 journal of political economy. 1973;p. 637–654.
- 381 [13] Halley JM, Iwasa Y. Neutral theory as a predictor of avifaunal extinc-  
382 tions after habitat loss. Proceedings of the National Academy of Sciences.  
383 2011;108(6):2316–2321.

- 384 [14] Kimura M. The neutral theory of molecular evolution. Cambridge Univer-  
385 sity Press; 1985.
- 386 [15] Hubbell SP. The unified neutral theory of biodiversity and biogeography  
387 (MPB-32). vol. 32. Princeton University Press; 2001.
- 388 [16] Bentley RA, Hahn MW, Shennan SJ. Random drift and culture change.  
389 Proceedings of the Royal Society of London B: Biological Sciences.  
390 2004;271(1547):1443–1450.
- 391 [17] Fernholz R, Karatzas I. Relative arbitrage in volatility-stabilized markets.  
392 Annals of Finance. 2005;1(2):149–177.
- 393 [18] Dangerfield C, Kay D, Burrage K. Stochastic models and simulation of ion  
394 channel dynamics. Procedia Computer Science. 2010;1(1):1587–1596.
- 395 [19] Volkov I, Banavar JR, Hubbell SP, Maritan A. Neutral theory and relative  
396 species abundance in ecology. Nature. 2003;424(6952):1035–1037.
- 397 [20] Tajima F. Statistical method for testing the neutral mutation hypothesis  
398 by DNA polymorphism. Genetics. 1989;123(3):585–595.
- 399 [21] Fay JC, Wu CI. Hitchhiking under positive Darwinian selection. Genetics.  
400 2000;155(3):1405–1413.
- 401 [22] Leigh EG. Neutral theory: a historical perspective. Journal of evolutionary  
402 biology. 2007;20(6):2075–2091.
- 403 [23] McGill BJ, Maurer BA, Weiser MD. Empirical evaluation of neutral theory.  
404 Ecology. 2006;87(6):1411–1423.
- 405 [24] Chave J, Alonso D, Etienne RS. Theoretical biology: comparing models of  
406 species abundance. Nature. 2006;441(7089):E1–E1.

- 407 [25] Chisholm RA, Condit R, Rahman KA, Baker PJ, Bunyavejchewin S, Chen  
408 YY, et al. Temporal variability of forest communities: empirical estimates  
409 of population change in 4000 tree species. *Ecology letters*. 2014;17(7):855–  
410 865.
- 411 [26] van Kampen NG. *Stochastic processes in physics and chemistry*. Amster-  
412 dam ; New York : New York: North-Holland; 1981.
- 413 [27] Pal S. Analysis of market weights under volatility-stabilized market models.  
414 *The Annals of Applied Probability*. 2011;21(3):1180–1213.
- 415 [28] Caporaso JG, Lauber CL, Costello EK, Berg-Lyons D, Gonzalez A,  
416 Stombaugh J, et al. Moving pictures of the human microbiome. *Genome*  
417 *Biol*. 2011;12(5):R50.
- 418 [29] Pardieck K, Ziolkowski Jr D, Hudson M. North american breeding bird  
419 survey dataset 1966-2013, version 2013.0. US Geological Survey, Patuxent  
420 Wildlife Research Center < [www.pwrc.usgs.gov/BBS/RawData](http://www.pwrc.usgs.gov/BBS/RawData). 2014;.
- 421 [30] White H. A heteroskedasticity-consistent covariance matrix estimator and  
422 a direct test for heteroskedasticity. *Econometrica: Journal of the Econo-*  
423 *metric Society*. 1980;p. 817–838.
- 424 [31] Washburne A. *Competition and Coexistence in an Unpredictable World*;  
425 2015.
- 426 [32] Hubbell SP. Neutral theory in community ecology and the hypothesis of  
427 functional equivalence. *Functional ecology*. 2005;19(1):166–172.
- 428 [33] Pflughoeft KJ, Versalovic J. Human microbiome in health and disease.  
429 *Annual Review of Pathology: Mechanisms of Disease*. 2012;7:99–122.

- 430 [34] David LA, Maurice CF, Carmody RN, Gootenberg DB, Button JE, Wolfe  
431 BE, et al. Diet rapidly and reproducibly alters the human gut microbiome.  
432 Nature. 2014;505(7484):559–563.
- 433 [35] Chicheportiche R, Bouchaud JP. Goodness-of-fit tests with dependent  
434 observations. Journal of Statistical Mechanics: Theory and Experiment.  
435 2011;2011(09):P09003.
- 436 [36] Marteau P, Vesa T. Pharmacokinetics of probiotics and biotherapeutic  
437 agents in humans. Bioscience and microflora. 1998;17(1):1–6.
- 438 [37] Fisher RA. The genetical theory of natural selection. Clarendon; 1930.
- 439 [38] Wright S. Evolution in Mendelian populations. Genetics. 1931;16(2):97.
- 440 [39] Durrett R. Probability models for DNA sequence evolution. Springer Sci-  
441 ence & Business Media; 2008.
- 442 [40] Everitt BS, Skrondal A. The Cambridge dictionary of statistics. Cambridge:  
443 Cambridge. 2002;.
